# Supplementary material for: Triple Negative Breast Cancer and Breast Epithelial Cells Differentially Reprogram Glucose and Lipid Metabolism upon Treatment with Triterpenic Acids
Source: PubMed Central journal article supplement (PMC7464159; doi:10.3390/biom10081163), 2020-08-08
Supplement: biomolecules-10-01163-s001.pdf [file biomolecules-10-01163-s001.pdf]

## Supplementary Information

### **Triple negative breast cancer and breast epithelial cells differentially reprogram glucose and lipid metabolism upon treatment with triterpenic acids**

Ângela R. Guerra <sup>1,2</sup>, Ana F. Paulino <sup>2</sup>, Maria M. Castro <sup>2</sup>, Helena Oliveira <sup>3</sup>, Maria F. Duarte <sup>2,4,\*</sup> and Iola F. Duarte <sup>1,\*</sup>

<sup>1</sup>CICECO-Aveiro Institute of Materials, Department of Chemistry, University of Aveiro, 3810-193 Aveiro, Portugal.

<sup>2</sup>Centro de Biotecnologia Agrícola e Agro-Alimentar do Alentejo (CEBAL)/Instituto Politécnico de Beja (IPBeja), Apartado 6158, 7801-908 Beja, Portugal.

<sup>3</sup>Department of Biology & CESAM, University of Aveiro, 3810-193 Aveiro, Portugal.

<sup>4</sup>MED – Mediterranean Institute for Agriculture, Environment and Development, CEBAL, 7801-908 Beja, Portugal.

\* Correspondence: fatima.duarte@cebal.pt; Tel.: + 351 284314399 (M.F.D); ioladuarte@ua.pt; Tel.: + 351 234401418 (I.F.D.)



**Figure S2.** A)  $^1\text{H}$  NMR spectra of organic extracts collected from MDA-MB-231 control cells (black) and cells treated for 48h with BA (blue). The  $^1\text{H}$  NMR spectrum of BA 1mM in  $\text{CDCl}_3$  is represented in red. B) MDA-MB-231 control cells (black) and cells treated for 48h with UA (blue). The  $^1\text{H}$  NMR spectrum of UA 1mM in  $\text{CDCl}_3$  is represented in red. The signals arising from TAs in treated cells are indicated in the respective spectra with red arrows. Lipid signals are numbered according to Supplementary Table S4.

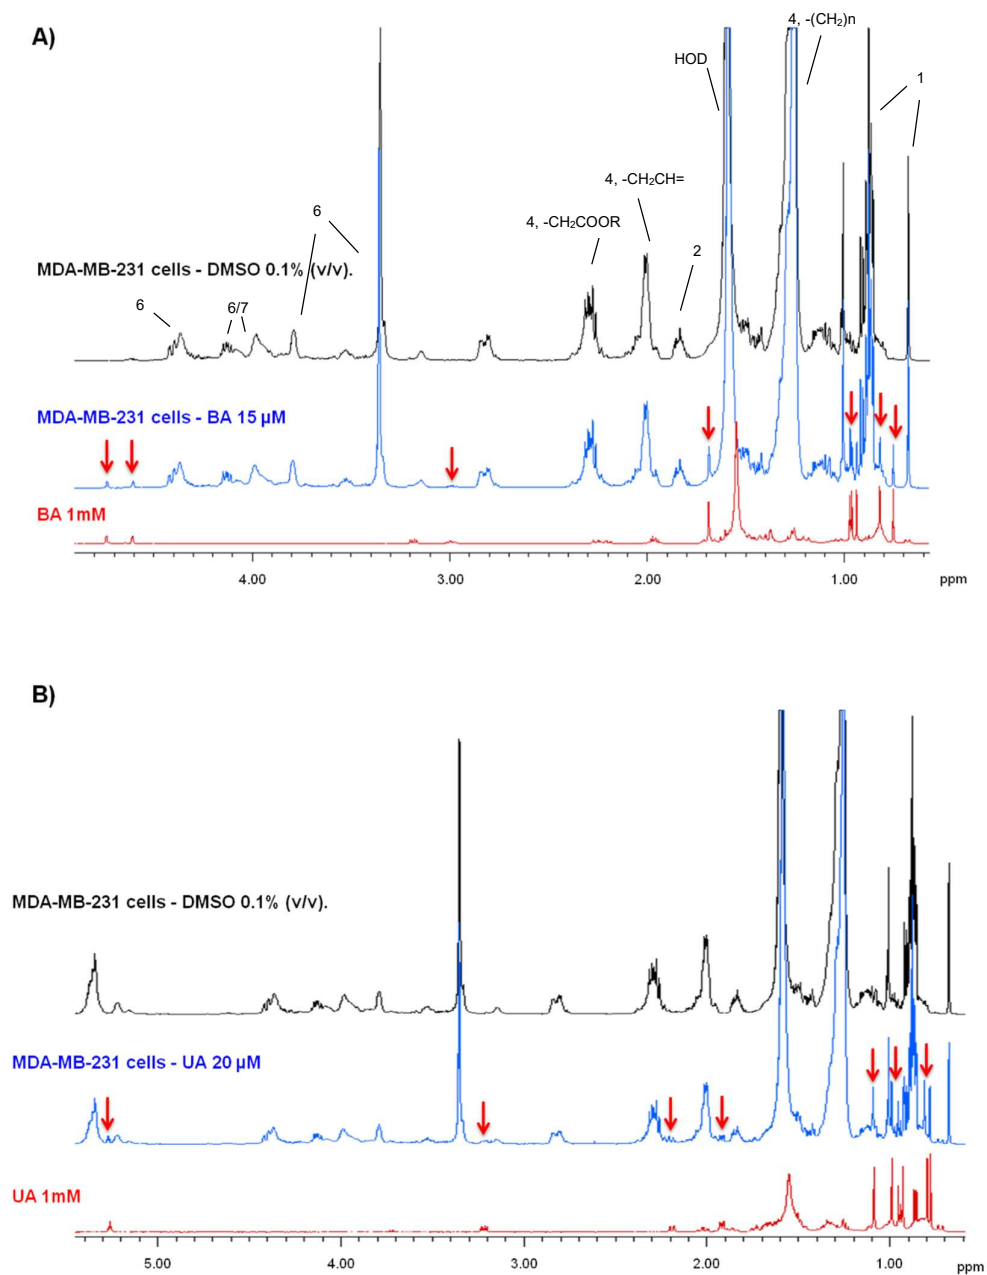

**Table S1.** Assignment of resonances in the NMR profile of polar extracts from MDA-MB-231 cells and MCF-10A cells. Multiplicity: s, singlet; d, doublet; t, triplet; m, multiplet; dd, double of doublets; br, broad signal.

| No. | Compound          | $\delta$ <sup>1</sup> H in ppm (multiplicity/<br>assignment)/ $\delta$ <sup>13</sup> C in ppm                                                                                                         | Cell type  |         |
|-----|-------------------|-------------------------------------------------------------------------------------------------------------------------------------------------------------------------------------------------------|------------|---------|
|     |                   |                                                                                                                                                                                                       | MDA-MB-231 | MCF-10A |
| 1   | Acetate           | 1.92 (s; $\beta$ -CH <sub>3</sub> )                                                                                                                                                                   | ✓          | ✓       |
| 2   | N-Acetylaspartate | 2.01 (s, CH <sub>3</sub> ); 2.48 (dd, $\beta$ -CH <sub>2</sub> );<br>2.68 (dd, $\beta'$ -CH <sub>2</sub> ); 4.38 (dd, $\alpha$ -CH)                                                                   | ✓          | ✓       |
| 3   | ADP               | 4.21 (m, C5'H, ribose); 4.38 (m,<br>C4'H, ribose)/86.25; 4.50 (m,<br>C2'H, ribose)/72.96; 6.14 (d,<br>C1'H, ribose)/89.49; 8.28 (s, C8,<br>ring); 8.54(s, C2, ring)                                   | ✓          | ✓       |
| 4   | Alanine           | 1.48 (d, $\beta$ -CH <sub>3</sub> )/18.47; 3.78 (q, $\alpha$ -<br>CH)                                                                                                                                 | ✓          | ✓       |
| 5   | $\beta$ -Alanine  | 2.56 (t, $\beta$ -CH <sub>2</sub> )/36.00; 3.17 (t, $\alpha$ -<br>CH <sub>2</sub> )/39.18                                                                                                             | ✓          | ✓       |
| 6   | Arginine          | 1.65 (m, $\gamma$ -CH <sub>2</sub> ); 1.92 (m, $\beta$ -CH <sub>2</sub> );<br>3.23 (t, $\delta$ -CH <sub>2</sub> ); 3.76 ( $\alpha$ -CH <sub>3</sub> )                                                | ✓          | ✓       |
| 7   | Asparagine        | 2.85 (dd, $\beta$ -CH <sub>3</sub> ); 2.95 (dd, $\beta'$ -<br>CH <sub>3</sub> ); 3.99 (dd, $\alpha$ -CH)                                                                                              | ✓          | ✓       |
| 8   | Aspartate         | 2.70 (dd, $\beta$ -CH); 2.80 (dd, $\beta'$ -CH);<br>3.90 (dd, $\alpha$ -CH)                                                                                                                           | ✓          | ✓       |
| 9   | ATP               | 4.23 (m, C5'H, ribose)/67.34; 4.29<br>(m, C5'H, ribose); 4.38 (m, C4'H,<br>ribose)/86.25; 4.59 (m, C2'H,<br>ribose)/72.59; 6.14 (d, C1'H,<br>ribose)/89.49; 8.28 (s, C2, ring);<br>8.54 (s, NH, ring) | ✓          | ✓       |
| 10  | Citrate           | 2.53 (d, CH <sub>3</sub> )/48.07; 2.65 (d, $\alpha'$ ,<br>$\beta'$ -CH <sub>2</sub> )/48.33                                                                                                           | ✓          | ✓       |
| 11  | Choline           | 3.21 (s, N(CH <sub>3</sub> ) <sub>3</sub> )/56.53; 3.52 (m,<br>CH <sub>2</sub> (NH)); 4.05 (m, CH <sub>2</sub> (OH))                                                                                  | ✓          | ✓       |
| 12  | Creatine          | 3.03 (s, CH <sub>3</sub> )/39.62; 3.92 (s,<br>CH <sub>2</sub> )/56.35                                                                                                                                 | ✓          | ✓       |
| 13  | Cysteine          | 3.09 (m, $\beta$ -CH <sub>2</sub> ); 3.94 (dd, $\alpha$ -<br>CH)/58.74                                                                                                                                | ✓          | ✓       |
| 14  | Formate           | 8.46 (s, CH)                                                                                                                                                                                          | ✓          | ✓       |
| 15  | Fumarate          | 6.52 (s, CH)                                                                                                                                                                                          | ✓          | ✓       |
| 16  | $\alpha$ -Glucose | 3.41 (m, C4H); 3.54 (dd,<br>C2H)/73.63; 3.67 (m, C3H)/75.19;<br>3.81 (m, C6H)/63.11; 3.85 (m,<br>C5H)/63.11; 5.23 (d, C1H)                                                                            | ✓          | ✓       |
| 17  | $\beta$ -Glucose  | 3.28 (dd, C2H)/76.83; 3.41 (m,<br>C4H); 3.47 (m, C5H); 3.48 (t,<br>C3H); 3.76 (m, C6H)/63.11; 3.85<br>(dd C6'H)/63.11; 4.65 (d, C1H)                                                                  | ✓          | ✓       |

**Table S1.** (cont.)

| No. | Compound                     | $\delta$ <sup>1</sup> H in ppm ( multiplicity/<br>assignment)/ $\delta$ <sup>13</sup> C in ppm                                                                                                                                                                                                        | Cell type  |         |
|-----|------------------------------|-------------------------------------------------------------------------------------------------------------------------------------------------------------------------------------------------------------------------------------------------------------------------------------------------------|------------|---------|
|     |                              |                                                                                                                                                                                                                                                                                                       | MDA-MB-231 | MCF-10A |
| 18  | Glucose-1-phosphate          | 3.40 (t, C4H); 3.49 (m, C2H); 3.77 (m, C3H); 3.75 (m, C6H); 3.86 (m C6'H); 3.91 (m, C5'H)/73.20; 5.46 (dd, C1H)                                                                                                                                                                                       | ✓          | ✓       |
| 19  | Glutamate                    | 2.00 (m, $\beta$ -CH <sub>2</sub> )/26.35; 2.13 (m, $\beta'$ -CH <sub>2</sub> ); 2.34 (m, $\gamma$ -CH <sub>2</sub> ); 3.75 ( $\alpha$ CH);                                                                                                                                                           | ✓          | ✓       |
| 20  | Glutamine                    | 2.11 (m (m, $\beta$ -CH <sub>2</sub> ); 2.45 (m, $\gamma$ -CH <sub>2</sub> ); 3.78 (t, $\alpha$ -CH)                                                                                                                                                                                                  | ✓          | ✓       |
| 21  | Glutathione, oxidised (GSSG) | 2.16 (m, $\beta$ -CH <sub>2</sub> , Glu)/28.95; 2.55 (m, $\gamma$ -CH <sub>2</sub> , Glu)/23.95; 3.00 (m, $\beta$ -CH <sub>2</sub> , Cys)/41.60; 3.30 (m, $\beta$ -CH <sub>2</sub> , Cys')/41.15; 3.77 ( $\alpha$ -CH, Gly)/45.97; 3.76 ( $\alpha$ -CH, Glu)/56.85; 4.74 (m, $\alpha$ -CH, Cys)/55.17 | ✓          | ✓       |
| 22  | Glutathione, reduced (GSH)   | 2.16 (m, $\beta$ -CH <sub>2</sub> , Glu)/28.83; 2.54 (m, $\gamma$ -CH <sub>2</sub> , Glu)/33.91; 2.95 (m, $\beta$ -CH <sub>2</sub> , Cys)/28.14; 3.77 ( $\alpha$ -CH, Gly)/45.97; 3.78 ( $\alpha$ -CH, Glu)/56.8; 4.56 (m, $\alpha$ -CH, Cys)/58.30; 8.35 (NH, Gly)                                   | ✓          | ✓       |
| 23  | Glycerophosphocholine (GPC)  | 3.23 (s, N(CH <sub>3</sub> ) <sub>3</sub> )/56.72; 3.68 ( $\beta'$ -CH <sub>2</sub> (N))/68.52; 4.32 (m, $\alpha'$ -CH <sub>2</sub> (P))/61.97                                                                                                                                                        | ✓          | ✓       |
| 24  | Glycine                      | 3.56 (s, $\alpha$ -CH <sub>2</sub> )/43.98                                                                                                                                                                                                                                                            | ✓          | ✓       |
| 25  | Histidine                    | 3.27 (m, $\beta$ -CH <sub>2</sub> ); 3.99(dd $\alpha$ CH); 7.08 (s, C4H, ring); 7.84 (s, C2H, ring)                                                                                                                                                                                                   | ✓          | ✓       |
| 26  | 3-Hydroxybutyrate            | 1.08 (d, $\gamma$ -CH <sub>3</sub> ); 2.28 (dd, CH <sub>2</sub> ); 2.42 (dd, CH <sub>2</sub> ); 4.14 (m, CH)                                                                                                                                                                                          | ✓          | ✓       |
| 27  | <i>myo</i> -Inositol         | 3.27 (t, C5H)/77.01; 3.54 (C1H, C3H)/73.71; 3.61 (dd, C4H, C6H)/75.00; 4.07 (t, C2H)/74.85                                                                                                                                                                                                            | ✓          | ✓       |
| 28  | Isoleucine                   | 0.94 (t, $\delta$ -CH <sub>3</sub> )/13.58; 1.00 (d, $\beta'$ -CH <sub>3</sub> )/17.26; 1.27 (m, $\gamma$ -CH <sub>2</sub> )/27.33; 1.47 (m, $\gamma'$ -CH <sub>2</sub> )/27.01; 1.97 (m, $\beta$ -CH)/38.33                                                                                          | ✓          | ✓       |
| 29  | $\alpha$ -Ketoglutarate      | 2.44 (t, $\beta$ -CH <sub>2</sub> ); 3.00 (t, $\gamma$ -CH <sub>2</sub> )                                                                                                                                                                                                                             | ✓          | ✓       |
| 30  | Ketoleucine                  | 0.92 (d, $\delta$ -CH <sub>3</sub> ); 2.10 (m, $\gamma$ -CH); 2.61 (d, $\beta$ -CH <sub>2</sub> )                                                                                                                                                                                                     | ✓          | ✓       |
| 31  | Lactate                      | 1.32 (d, $\beta$ -CH <sub>3</sub> )/22.60; 4.10 (m, $\alpha$ -CH)/71.09                                                                                                                                                                                                                               | ✓          | ✓       |
| 32  | Leucine                      | 0.95 (d, $\delta$ -CH <sub>3</sub> )/23.47; 0.96 (d, $\delta'$ -CH <sub>3</sub> )/24.61; 1.69 (m, $\gamma$ -CH)/42.48; 1.72 (m, $\beta$ -CH <sub>2</sub> ); 3.73 (t, $\alpha$ -CH)                                                                                                                    | ✓          | ✓       |

**Table S1.** (cont.)

| No. | Compound               | $\delta$ <sup>1</sup> H in ppm ( multiplicity/<br>assignment)/ $\delta$ <sup>13</sup> C in ppm                                                                                                                                  | Cell type  |         |
|-----|------------------------|---------------------------------------------------------------------------------------------------------------------------------------------------------------------------------------------------------------------------------|------------|---------|
|     |                        |                                                                                                                                                                                                                                 | MDA-MB-231 | MCF-10A |
| 33  | Lysine                 | 1.49 (m, $\gamma$ -CH <sub>2</sub> ); 1.72 (m, $\delta$ -CH <sub>2</sub> )/28.86; 1.90 (m, $\beta$ -CH <sub>2</sub> ); 3.00 (t, $\epsilon$ -CH <sub>2</sub> )/41.57; 3.76 (t, $\alpha$ -CH)/57.10                               | ✓          | ✓       |
| 34  | Malate                 | 2.38 (dd, $\beta'$ -CH); 2.67 (dd, $\beta$ -CH); 4.30 (dd, $\alpha$ -CH)                                                                                                                                                        | ✓          | ✓       |
| 35  | Methionine             | 2.13 (s, $\beta$ -CH <sub>2</sub> ); 2.16 (t, $\beta$ -CH <sub>2</sub> ); 2.61 (t, $\gamma$ -CH <sub>2</sub> ); 3.85 (t, $\alpha$ -CH)                                                                                          | ✓          | ✓       |
| 36  | 3-Methyl-2-oxovalerate | 0.90(t, $\delta$ -CH <sub>3</sub> ), 1.10 (d, $\beta'$ -CH <sub>3</sub> ), 1.45(m, $\gamma$ -CH), 1.70 (m, $\gamma'$ -CH <sub>2</sub> ), 2.95 (m, $\beta$ -CH)                                                                  | ✓          | ✓       |
| 37  | NAD <sup>+</sup>       | 4.28 (m, A5')/85.91; 4.36 (m, A4')/72.35; 4.38 (m, A4'/N5'); 4.42 (dd, N3')/ 72.64; 4.50 (m, A3'); 4.55 (m, N2'); 6.04 (d, N1'); 6.09 (d, A1'); 8.18 (s, A2); 8.20 (N5); 8.43 (s, A8); 8.84 (d, N4); 9.15 (d, N6); 9.34 (s, N2) | ✓          | ✓       |
| 38  | NADH                   | 2.70 (m, N4); 4.08 (br. s., N2'); 4.17 (m, N4'); 4.21 (d, N3'); 4.25 (m, A5')/67.70; 4.40 (m, A4')/86.32; 4.50 (m, A3')/73.18; 4.75 (N5); 5.98 (dd, N6); 6.12 (d, A1'); 6.95 (d, N2); 8.23 (s, A2), 8.48 (s, A8)                | ✓          | ✓       |
| 39  | Pantothenate           | 0.90 (s, CH <sub>3</sub> ); 0.94 (s, CH <sub>3</sub> ); 2.42 (t, $\alpha$ -CH <sub>2</sub> ); 3.38 (d, CH <sub>2</sub> ); 3.43 (q, $\beta$ -CH <sub>2</sub> ); 3.50 (d, CH <sub>2</sub> ); 3.98 (s, CH)                         | ✓          | ✓       |
| 40  | Phenylalanine          | 3.16 (m, $\beta$ -CH)/ 38.27; 3.29 (dd, $\beta'$ -CH); 3.99 (m, $\alpha$ -CH)/56.67; 7.32 (d, C2H, C6H, ring)/131.95; 7.39 (d, C4H, ring); 7.41 (t, C3H, C5H, ring)/131.70                                                      | ✓          | ✓       |
| 41  | Phosphocholine (PC)    | 3.22 (s, N(CH <sub>3</sub> ) <sub>3</sub> )/56.72; 3.59 (m, N-CH <sub>2</sub> )/69.00; 4.16 (m, PO <sub>3</sub> - CH <sub>2</sub> )/60.67                                                                                       | ✓          | ✓       |
| 42  | Phosphocreatine        | 3.04 (s, CH <sub>3</sub> ); 3.95 (s, CH <sub>2</sub> )                                                                                                                                                                          | ✓          | ✓       |
| 43  | Proline                | 1.99 (m, $\gamma$ -CH <sub>2</sub> )/26.35; 2.05 (m, $\beta$ -CH)/31.44; 2.34 (m, $\beta'$ -CH)/31.54; 3.34 (dt, $\delta$ -CH)/48.61; 3.40 (dt, $\delta'$ -CH)/38.78; 4.13 (dd, $\alpha$ -CH)/63.93                             | ✓          | ✓       |
| 44  | Pyroglutamate          | 2.00 (m, $\beta$ -CH <sub>2</sub> ); 2.40 (m, $\gamma$ -CH <sub>2</sub> )/32.27; 2.51 (m, $\beta'$ -CH 2 ); 4.17 (dd, $\alpha$ -CH)                                                                                             | ✓          | ✓       |
| 45  | Pyruvate               | 2.36 (s, $\beta$ -CH <sub>3</sub> )                                                                                                                                                                                             | ✓          | ✓       |

**Table S1.** (cont.)

| No. | Compound                                       | $\delta$ <sup>1</sup> H in ppm ( multiplicity/<br>assignment)/ $\delta$ <sup>13</sup> C in ppm                                                                                               | Cell type  |         |
|-----|------------------------------------------------|----------------------------------------------------------------------------------------------------------------------------------------------------------------------------------------------|------------|---------|
|     |                                                |                                                                                                                                                                                              | MDA-MB-231 | MCF-10A |
| 46  | Serine                                         | 3.84 (dd, $\alpha$ -CH); 3.97 (m, $\beta$ -CH <sub>2</sub> )                                                                                                                                 | ✓          | ✓       |
| 47  | Sorbitol                                       | 3.62 (m, C1H/C4H/C6H)/54.67,<br>3.73(d, C6H), 3.77 (m, C3H), 3.81<br>(d, C1H), 3.83 (m, C2H/C5H)                                                                                             | ✓          | ✓       |
| 48  | Succinate                                      | 2.41 (s, CH <sub>2</sub> )                                                                                                                                                                   | ✓          | ✓       |
| 49  | Taurine                                        | 3.27 (t, S-CH <sub>2</sub> )/50.10; 3.42 (t, N-<br>CH <sub>2</sub> )/38.05                                                                                                                   | ✓          | ✓       |
| 50  | Threonine                                      | 1.32 (d, $\gamma$ -CH <sub>3</sub> )/22.62; 3.60 (d, $\alpha$ -<br>CH)/62.97; 4.23 (m, $\beta$ -CH)/67.27                                                                                    | ✓          | ✓       |
| 51  | Tryptophan                                     | 3.28 (dd, $\beta$ -CH); 3.48 (dd, $\beta'$ -CH);<br>4.01 (dd, $\alpha$ -CH); 7.21 (t, C5H,<br>ring); 7.29 (t, C6H, ring); 7.32 (s,<br>C2H, ring); 7.55 (d, C7H, ring);<br>7.74 (d, C4H,ring) | ✓          | ✓       |
| 52  | Tyrosine                                       | 3.06 (m, $\beta'$ -CH); 3.19 (m, $\beta$ -CH);<br>3.94 (m, $\alpha$ -CH); 6.90 (d, C3H,<br>C5H, ring); 7.20 (d, C2H, C6H,<br>ring)                                                           | ✓          | ✓       |
| 53  | UDP                                            | 4.26 (m, C5'H, ribose); 4.30 (m,<br>C4'H, ribose); 4.38 (t, C2'H,<br>ribose); 5.95 (s, C1'H, ribose);<br>5.97 (d, C6, ring); 8.00 (d, C5,<br>ring)                                           | ✓          | ✓       |
| 54  | UDP-N-acetyl-<br>galactosamine<br>(UDP-GalNAc) | 5.56 (dd, C1'')                                                                                                                                                                              | ✓          | ✓       |
| 55  | UDP-Glucose<br>(UDP-Glc)                       | 5.60 (dd, C1'');                                                                                                                                                                             | ✓          | ✓       |
| 56  | UDP-N-acetyl-<br>glucosamine<br>(UDP-GlcNAc)   | 5.52 (dd, C1'')                                                                                                                                                                              | ✓          | ✓       |
| 58  | UMP                                            | 3.99 (m, C5'H, ribose); 4.24 (m,<br>C4'H, ribose); 4.41 (t, C2'H,<br>ribose); 5.98 (m, C1'H, ribose/C6,<br>ring); 8.12 (d, C5, ring)                                                         | ✓          | ✓       |
| 59  | UTP                                            | 4.25 (m, C4'H, ribose); 4.26 (m,<br>C5'H, ribose); 4.43 (t, C2'H,<br>ribose); 5.95 (s, C1'H, ribose);<br>5.97 (d, C6, ring); 7.98 (d, C5,<br>ring)                                           | ✓          | ✓       |
| 60  | Valine                                         | 0.99 (d, $\gamma$ -CH <sub>3</sub> )/19.21; 1.03 (d, $\gamma'$ -<br>CH <sub>3</sub> )/20.48; 2.26 (m, $\beta$ -CH); 3.59<br>(d, $\alpha$ -CH)/62.98                                          | ✓          | ✓       |

**Table S2.** Main metabolite variations in polar extracts of MDA-MB-231 cells exposed to 5  $\mu$ M and 15  $\mu$ M of BA and 10  $\mu$ M and 20  $\mu$ M of UA, in relation to controls, expressed as % variation (%var) and respective error ( $\pm$ ), effect size (ES) and  $p$ -value ( $p$ ). The variations with  $|ES| < 0.8$  (or standard error  $> |ES|$ , or mean error  $> |\%$  variation $)$  were considered null.

|          |       | BA        |         |            |         | UA         |         |            |         |
|----------|-------|-----------|---------|------------|---------|------------|---------|------------|---------|
|          |       | 5 $\mu$ M |         | 15 $\mu$ M |         | 10 $\mu$ M |         | 20 $\mu$ M |         |
|          |       | 48h       | 48h+24h | 48h        | 48h+24h | 48h        | 48h+24h | 48h        | 48h+24h |
| Acetate  | %var  | 0         | 0       | 21.07      | 22.70   | 0          | 0       | 10.69      | 11.02   |
|          | $\pm$ |           |         | 6.65       | 4.17    |            |         | 7.27       | 1.74    |
|          | ES    | 0         | 0       | 1.76       | 3.01    | 0          | 0       | 0.86       | 3.70    |
|          | $p$   |           |         | 0.0479     | 0.0145  |            |         | 0.2390     | 0.0033  |
| Lactate  | %var  | 53.08     | 0       | 55.73      | 0       | 0          | 0       | 0          | 0       |
|          | $\pm$ | 8.85      |         | 9.41       |         |            |         |            |         |
|          | ES    | 2.91      | 0       | 2.85       | 0       | 0          | 0       | 0          | 0       |
|          | $p$   | 0.0115    |         | 0.0072     |         |            |         |            |         |
| Citrate  | %var  | -40.97    | -12.45  | -51.74     | -19.78  | -23.26     | -10.99  | -19.44     | -15.02  |
|          | $\pm$ | 6.03      | 2.83    | 4.92       | 4.29    | 3.54       | 6.13    | 3.20       | 4.21    |
|          | ES    | -5.25     | -2.88   | -8.72      | -3.15   | -4.58      | -1.17   | -4.14      | -2.37   |
|          | $p$   | 0.0002    | 0.0169  | 1.0804E-05 | 0.0022  | 0.0014     | 0.1232  | 0.0052     | 0.0085  |
| Fumarate | %var  | -35.42    | 0       | -37.50     | 0       | 0          | 0       | -10.42     | -10.34  |
|          | $\pm$ | 9.58      |         | 17.01      |         |            |         | 9.75       | 6.30    |
|          | ES    | -2.76     | 0       | -1.67      | 0       | 0          | 0       | -0.69      | -1.06   |
|          | $p$   | 0.0043    |         | 0.0497     |         |            |         | 0.3040     | 0.1817  |
| Glu      | %var  | -24.61    | 0       | -37.41     | -11.90  | 0          | 0       | 0          | 0       |
|          | $\pm$ | 5.09      |         | 5.86       | 3.07    |            |         |            |         |
|          | ES    | -3.39     | 0       | -4.83      | -2.53   | 0          | 0       | 0          | 0       |
|          | $p$   | 0.0029    |         | 0.0003     | 0.0186  |            |         |            |         |
| Gln      | %var  | -28.49    | 0       | -20.94     | -5.26   | -13.00     | 0       | 0          | 0       |
|          | $\pm$ | 5.90      |         | 6.99       | 4.20    | 7.36       |         |            |         |
|          | ES    | -3.46     | 0       | -2.06      | -0.79   | -1.16      | 0       | 0          | 0       |
|          | $p$   | 0.0094    |         | 0.0172     | 0.2604  | 0.1079     |         |            |         |
| Asp      | %var  | -30.52    | 0       | -12.45     | 0       | 0          | 0.00    | 24.90      | 32.91   |
|          | $\pm$ | 8.61      |         | 8.21       |         |            |         | 6.51       | 9.58    |
|          | ES    | -2.57     | 0       | -0.99      | 0       | 0          | 0.00    | 2.09       | 1.81    |
|          | $p$   | 0.0096    |         | 0.1632     |         |            |         | 0.0205     | 0.0390  |



**Table S2.** (cont.)

|     |          | BA     |         |        |            | UA   |         |        |            |
|-----|----------|--------|---------|--------|------------|------|---------|--------|------------|
|     |          | 5μM    |         | 15μM   |            | 10μM |         | 20μM   |            |
|     |          | 48h    | 48h+24h | 48h    | 48h+24h    | 48h  | 48h+24h | 48h    | 48h+24h    |
| Ala | %var     | -12.64 | -7.44   | -10.34 | -12.62     | 0    | 0.00    | 0      | -12.11     |
|     | ±        | 4.36   | 1.59    | 4.24   | 1.60       |      |         |        | 3.37       |
|     | ES       | -1.90  | -2.98   | -1.58  | -5.19      | 0    | 0.00    | 0      | -2.35      |
|     | <i>p</i> | 0.0219 | 0.0063  | 0.0429 | 0.0009     |      |         |        | 0.0162     |
| Gly | %var     | 0      | -8.57   | -9.59  | -31.75     | 0    | -7.50   | -15.08 | -25.85     |
|     | ±        |        | 1.94    | 6.90   | 1.84       |      | 2.44    | 5.06   | 1.37       |
|     | ES       | 0      | -2.83   | -0.90  | -12.58     | 0    | -1.96   | -1.98  | -13.32     |
|     | <i>p</i> |        | 0.0052  | 0.1990 | 1.0429E-06 |      | 0.0297  | 0.0219 | 4.8081E-06 |
| Pro | %var     | 16.73  | 0       | 21.93  | 0          | 0    | 0       | 0      | 0          |
|     | ±        | 3.54   |         | 4.78   |            |      |         |        |            |
|     | ES       | 2.68   | 0       | 2.54   | 0          | 0    | 0       | 0      | 0          |
|     | <i>p</i> | 0.0112 |         | 0.0184 |            |      |         |        |            |
| Leu | %var     | 15.91  | 0       | 33.86  | 0          | 0    | 0       | 0      | 0          |
|     | ±        | 2.07   |         | 6.04   |            |      |         |        |            |
|     | ES       | 4.38   | 0       | 2.95   | 0          | 0    | 0       | 0      | 0          |
|     | <i>p</i> | 0.0037 |         | 0.0112 |            |      |         |        |            |
| Ile | %var     | 14.68  | 0       | 30.97  | 0          | 0    | 0       | 0      | 0          |
|     | ±        | 2.06   |         | 6.19   |            |      |         |        |            |
|     | ES       | 4.08   | 0       | 2.66   | 0          | 0    | 0       | 0      | 0          |
|     | <i>p</i> | 0.0044 |         | 0.0157 |            |      |         |        |            |
| Val | %var     | 18.46  | 0       | 38.79  | 0          | 0    | 0       | 0      | 0          |
|     | ±        | 1.97   |         | 6.70   |            |      |         |        |            |
|     | ES       | 5.28   | 0       | 2.98   | 0          | 0    | 0       | 0      | 0          |
|     | <i>p</i> | 0.0008 |         | 0.0127 |            |      |         |        |            |
| Phe | %var     | 6.80   | 0       | 24.06  | 0          | 0    | 0       | 0      | 0          |
|     | ±        | 2.51   |         | 6.82   |            |      |         |        |            |
|     | ES       | 1.61   | 0       | 1.94   | 0          | 0    | 0       | 0      | 0          |
|     | <i>p</i> | 0.0499 |         | 0.0403 |            |      |         |        |            |

**Table S2.** (cont.)

|         |          | BA        |         |            |         | UA         |         |            |         |
|---------|----------|-----------|---------|------------|---------|------------|---------|------------|---------|
|         |          | 5 $\mu$ M |         | 15 $\mu$ M |         | 10 $\mu$ M |         | 20 $\mu$ M |         |
|         |          | 48h       | 48h+24h | 48h        | 48h+24h | 48h        | 48h+24h | 48h        | 48h+24h |
| Tyr     | %var     | 8.11      | 0       | 28.53      | 0       | 0          | 0       | 0          | 0       |
|         | $\pm$    | 2.49      |         | 6.45       |         |            |         |            |         |
|         | ES       | 1.93      | 0       | 2.38       | 0       | 0          | 0       | 0          | 0       |
|         | <i>p</i> | 0.0418    |         | 0.0202     |         |            |         |            |         |
| PCr     | %var     | -19.36    | 0       | -22.44     | -14.19  | -13.59     | 0       | -10.77     | 0       |
|         | $\pm$    | 4.46      |         | 5.44       | 4.07    | 4.18       |         | 5.40       |         |
|         | ES       | -2.95     | 0       | -2.86      | -2.31   | -2.15      | 0       | -1.30      | 0       |
|         | <i>p</i> | 0.0077    |         | 0.0037     | 0.0134  | 0.0279     |         | 0.0797     |         |
| Cr      | %var     | 22.45     | 0       | 18.99      | 0       | 0          | 0       | 0          | 0       |
|         | $\pm$    | 6.47      |         | 4.87       |         |            |         |            |         |
|         | ES       | 1.92      | 0       | 2.19       | 0       | 0          | 0       | 0          | 0       |
|         | <i>p</i> | 0.0274    |         | 0.0120     |         |            |         |            |         |
| ATP     | %var     | 0         | -7.54   | 0          | -15.36  | 0          | 0       | 0          | -9.33   |
|         | $\pm$    |           | 3.18    |            | 2.60    |            |         |            | 1.38    |
|         | ES       | 0         | -1.52   | 0          | -3.93   | 0          | 0       | 0          | -4.37   |
|         | <i>p</i> |           | 0.0814  |            | 0.0045  |            |         |            | 0.0007  |
| Choline | %var     | 10.16     | 0       | 12.46      | 0       | -6.23      | 0       | 0          | 0       |
|         | $\pm$    | 4.87      |         | 7.21       |         | 4.52       |         |            |         |
|         | ES       | 1.22      | 0       | 1.00       | 0       | -0.87      | 0       | 0          | 0       |
|         | <i>p</i> | 0.0962    |         | 0.1752     |         | 0.2050     |         |            |         |
| PC      | %var     | -24.96    | 0       | -38.62     | 0       | -7.00      | 0       | -6.17      | 21.66   |
|         | $\pm$    | 3.54      |         | 7.32       |         | 4.26       |         | 4.36       | 2.40    |
|         | ES       | -4.96     | 0       | -4.02      | 0       | -1.05      | 0       | -0.90      | 5.01    |
|         | <i>p</i> | 0.0002    |         | 0.0029     |         | 0.1479     |         | 0.2042     | 0.0011  |
| GPC     | %var     | 13.50     | 0       | 26.27      | 0       | 9.94       | 0       | 10.72      | -6.52   |
|         | $\pm$    | 2.21      |         | 5.30       |         | 3.24       |         | 5.81       | 2.25    |
|         | ES       | 3.52      | 0       | 2.69       | 0       | 1.80       | 0       | 1.08       | -1.84   |
|         | <i>p</i> | 0.0048    |         | 0.0125     |         | 0.0275     |         | 0.1575     | 0.0275  |

**Table S2.** (cont.)

|                 |          | BA        |         |            |         | UA         |         |            |         |
|-----------------|----------|-----------|---------|------------|---------|------------|---------|------------|---------|
|                 |          | 5 $\mu$ M |         | 15 $\mu$ M |         | 10 $\mu$ M |         | 20 $\mu$ M |         |
|                 |          | 48h       | 48h+24h | 48h        | 48h+24h | 48h        | 48h+24h | 48h        | 48h+24h |
| GSH             | %var     | -15.77    | 0       | -25.87     | 0       | -7.40      | 0       | -7.50      | -8.79   |
|                 | $\pm$    | 4.65      |         | 6.40       |         | 5.98       |         | 5.29       | 3.95    |
|                 | ES       | -2.26     | 0       | -2.86      | 0       | -0.79      | 0       | -0.91      | -1.43   |
|                 | <i>p</i> | 0.0223    |         | 0.0035     |         | 0.2457     |         | 0.1939     | 0.0870  |
| Tau             | %var     | 6.09      | 0       | 7.79       | 0       | 0          | 0       | 11.82      | 0       |
|                 | $\pm$    | 1.92      |         | 2.61       |         |            |         | 1.46       |         |
|                 | ES       | 1.90      | 0       | 1.76       | 0       | 0          | 0       | 4.70       | 0       |
|                 | <i>p</i> | 0.0407    |         | 0.0561     |         |            |         | 0.0013     |         |
| <i>myo</i> -Ino | %var     | -8.23     | -6.52   | -18.58     | -17.84  | 0          | 0       | 0          | -9.02   |
|                 | $\pm$    | 1.20      | 1.59    | 2.70       | 2.57    |            |         |            | 1.41    |
|                 | ES       | -4.41     | -2.61   | -4.67      | -4.69   | 0          | 0       | 0          | -4.13   |
|                 | <i>p</i> | 0.0011    | 0.0062  | 0.0014     | 0.0014  |            |         |            | 0.0005  |

**Table S3.** Main metabolite variations in polar extracts of MCF-10A cells exposed to 5  $\mu$ M and 15  $\mu$ M of BA and 10  $\mu$ M and 20  $\mu$ M of UA, in relation to controls, expressed as % variation (%var) and respective error ( $\pm$ ), effect size (ES) and *p*-value (*p*). The variations with  $|ES| < 0.8$  (or standard error  $> |ES|$ , or mean error  $> |%$  variation $|$ ) were considered null.

|                     |          | BA         |         |            |         | UA         |         |
|---------------------|----------|------------|---------|------------|---------|------------|---------|
|                     |          | 5 $\mu$ M  |         | 10 $\mu$ M |         | 20 $\mu$ M |         |
|                     |          | 48h        | 48h+24h | 48h        | 48h+24h | 48h        | 48h+24h |
| Glucose             | %var     | -56.45     | 0       | -71.26     | -31.96  | -85.89     | -67.35  |
|                     | $\pm$    | 29.74      |         | 15.82      | 16.86   | 15.82      | 21.76   |
|                     | ES       | -1.63      | 0       | -4.30      | -1.39   | -5.85      | -2.87   |
|                     | <i>p</i> | 0.0567     |         | 0.0007     | 0.0810  | 0.0007     | 0.0067  |
| Glucose-1-phosphate | %var     | -93.58     | -92.25  | -75.94     | 0       | -78.61     | -40.85  |
|                     | $\pm$    | 16.11      | 35.07   | 17.96      |         | 12.98      | 16.06   |
|                     | ES       | -6.71      | -3.00   | -4.19      | 0       | -6.14      | -1.97   |
|                     | <i>p</i> | 0.0001     | 0.0057  | 0.0005     |         | 0.0006     | 0.0187  |
| UDP-GlcNAc          | %var     | 151.53     | 0       | 60.69      | 0       | 61.45      | 0       |
|                     | $\pm$    | 9.25       |         | 10.15      |         | 6.32       |         |
|                     | ES       | 5.73       | 0       | 2.82       | 0       | 4.57       | 0       |
|                     | <i>p</i> | 0.0015     |         | 0.0128     |         | 0.0009     |         |
| UDP-GalNAc          | %var     | 123.58     | 0       | 62.26      | 0       | 68.87      | 0       |
|                     | $\pm$    | 13.12      |         | 12.79      |         | 12.12      |         |
|                     | ES       | 3.58       | 0       | 2.28       | 0       | 2.60       | 0       |
|                     | <i>p</i> | 0.0026     |         | 0.0109     |         | 0.0060     |         |
| UDP-Glucose         | %var     | -75.09     | -66.89  | -19.78     | 0       | -32.23     | -20.07  |
|                     | $\pm$    | 9.60       | 20.53   | 6.86       |         | 7.47       | 4.37    |
|                     | ES       | -7.70      | -3.01   | -1.97      | 0       | -3.16      | -3.14   |
|                     | <i>p</i> | 0.0000     | 0.0139  | 0.0187     |         | 0.0021     | 0.0024  |
| Lactate             | %var     | 161.49     | 0       | 0          | 0       | 0          | 0       |
|                     | $\pm$    | 34.30      |         |            |         |            |         |
|                     | ES       | 1.60       | 0       | 0          | 0       | 0          | 0       |
|                     | <i>p</i> | 0.0786     |         |            |         |            |         |
| Citrate             | %var     | -74.68     | -61.27  | -36.91     | -18.09  | -38.52     | -32.19  |
|                     | $\pm$    | 3.76       | 5.96    | 3.57       | 8.81    | 3.85       | 8.84    |
|                     | ES       | -19.48     | -9.11   | -7.80      | -1.39   | -7.61      | -2.67   |
|                     | <i>p</i> | 2.8047E-06 | 0.0001  | 0.00002    | 0.0943  | 0.00002    | 0.0144  |

**Table S3.** (cont.)

|                      |             | BA      |         |        |         | UA      |         |
|----------------------|-------------|---------|---------|--------|---------|---------|---------|
|                      |             | 5μM     |         | 10μM   |         | 20μM    |         |
|                      |             | 48h     | 48h+24h | 48h    | 48h+24h | 48h     | 48h+24h |
| Fumarate             | <i>%var</i> | -80.00  | 0       | 0      | -22.45  | 0       | -34.69  |
|                      | ±           | 54.43   |         |        | 17.15   |         | 14.18   |
|                      | <i>ES</i>   | -1.51   | 0       | 0      | -0.91   | 0       | -1.82   |
|                      | <i>p</i>    | 0.0849  |         |        | 0.1908  |         | 0.0401  |
| Formate              | <i>%var</i> | 91.07   | 287.80  | 0      | 0       | 0       | 0       |
|                      | ±           | 13.94   | 19.51   |        |         |         |         |
|                      | <i>ES</i>   | 2.76    | 3.72    | 0      | 0       | 0       | 0       |
|                      | <i>p</i>    | 0.0092  | 0.0086  |        |         |         |         |
| 3-Hydroxyisobutyrate | <i>%var</i> | -48.45  | -48.51  | -23.71 | -22.77  | -30.93  | -30.69  |
|                      | ±           | 8.28    | 6.18    | 8.07   | 7.27    | 7.11    | 6.58    |
|                      | <i>ES</i>   | -4.75   | -6.38   | -2.05  | -2.17   | -3.16   | -3.39   |
|                      | <i>p</i>    | 0.0012  | 0.0006  | 0.0176 | 0.0124  | 0.0082  | 0.0018  |
| Acetate              | <i>%var</i> | 33.50   | 63.78   | 0      | 0       | 0       | 10.61   |
|                      | ±           | 7.76    | 13.91   |        |         |         | 3.19    |
|                      | <i>ES</i>   | 2.27    | 2.14    | 0      | 0       | 0       | 1.94    |
|                      | <i>p</i>    | 0.0138  | 0.0389  |        |         |         | 0.0236  |
| Glu                  | <i>%var</i> | -75.91  | -47.27  | -21.17 | 0       | -23.01  | -11.32  |
|                      | ±           | 8.73    | 8.30    | 6.62   |         | 6.62    | 7.41    |
|                      | <i>ES</i>   | -8.61   | -4.59   | -2.20  | 0       | -2.41   | -1.00   |
|                      | <i>p</i>    | 0.00003 | 0.0005  | 0.0128 |         | 0.0088  | 0.1665  |
| Gln                  | <i>%var</i> | 0       | 0       | 0      | 16.14   | 0       | 25.50   |
|                      | ±           |         |         |        | 2.45    |         | 2.43    |
|                      | <i>ES</i>   | 0       | 0       | 0      | 3.75    | 0       | 5.72    |
|                      | <i>p</i>    |         |         |        | 0.0023  |         | 0.0004  |
| Asp                  | <i>%var</i> | -48.70  | -24.38  | -38.30 | -26.58  | -46.10  | -37.26  |
|                      | ±           | 4.01    | 14.06   | 4.21   | 9.00    | 4.90    | 10.00   |
|                      | <i>ES</i>   | -9.87   | -1.21   | -6.92  | -2.09   | -7.52   | -2.82   |
|                      | <i>p</i>    | 0.0003  | 0.1111  | 0.0001 | 0.0146  | 0.00003 | 0.0038  |

Table S3. (cont.)

|     |             | BA     |         |            |         | UA     |         |
|-----|-------------|--------|---------|------------|---------|--------|---------|
|     |             | 5μM    |         | 10μM       |         | 20μM   |         |
|     |             | 48h    | 48h+24h | 48h        | 48h+24h | 48h    | 48h+24h |
| Ala | <i>%var</i> | -39.74 | -65.18  | 44.32      | 0       | 0      | 0       |
|     | ±           | 10.37  | 7.36    | 11.33      |         |        |         |
|     | <i>ES</i>   | -2.94  | -8.08   | 1.97       | 0       | 0      | 0       |
|     | <i>p</i>    | 0.0031 | 0.0001  | 0.0299     |         |        |         |
| Gly | <i>%var</i> | 41.70  | 0       | 40.31      | 24.70   | 38.29  | 31.50   |
|     | ±           | 5.34   |         | 4.91       | 6.74    | 4.53   | 5.56    |
|     | <i>ES</i>   | 3.97   | 0       | 4.20       | 2.01    | 4.36   | 3.01    |
|     | <i>p</i>    | 0.0010 |         | 0.0006     | 0.0435  | 0.0004 | 0.0137  |
| Pro | <i>%var</i> | 80.04  | 0       | 87.39      | 49.66   | 69.18  | 78.81   |
|     | ±           | 5.11   |         | 3.36       | 7.94    | 5.64   | 6.79    |
|     | <i>ES</i>   | 6.88   | 0       | 11.13      | 3.08    | 5.60   | 5.12    |
|     | <i>p</i>    | 0.0003 |         | 4.9446E-06 | 0.0102  | 0.0009 | 0.0018  |
| His | <i>%var</i> | -25.16 | -44.80  | 0          | 0       | 0      | 0       |
|     | ±           | 9.10   | 4.76    |            |         |        |         |
|     | <i>ES</i>   | -1.95  | -7.45   | 0          | 0       | 0      | 0       |
|     | <i>p</i>    | 0.0281 | 0.0001  |            |         |        |         |
| Leu | <i>%var</i> | 418.85 | 75.04   | 389.84     | 82.57   | 297.70 | 130.47  |
|     | ±           | 9.04   | 8.46    | 10.01      | 9.08    | 15.33  | 6.93    |
|     | <i>ES</i>   | 9.21   | 3.97    | 8.12       | 3.96    | 4.80   | 7.01    |
|     | <i>p</i>    | 0.0002 | 0.0020  | 0.0001     | 0.0010  | 0.0002 | 0.0002  |
| Ile | <i>%var</i> | 218.16 | 36.26   | 211.80     | 58.71   | 156.93 | 94.71   |
|     | ±           | 6.74   | 8.03    | 8.75       | 8.29    | 13.07  | 6.37    |
|     | <i>ES</i>   | 9.52   | 2.35    | 7.23       | 3.37    | 4.14   | 6.20    |
|     | <i>p</i>    | 0.0003 | 0.0149  | 0.00003    | 0.0018  | 0.0008 | 0.0003  |
| Val | <i>%var</i> | 138.35 | 10.36   | 151.36     | 47.98   | 101.22 | 70.45   |
|     | ±           | 7.05   | 7.17    | 7.07       | 7.20    | 10.19  | 6.25    |
|     | <i>ES</i>   | 7.14   | 0.84    | 7.50       | 3.31    | 4.05   | 5.12    |
|     | <i>p</i>    | 0.0005 | 0.2444  | 0.0002     | 0.0021  | 0.0006 | 0.0003  |

**Table S3.** (cont.)

|                      |             | BA     |         |        |         | UA     |         |
|----------------------|-------------|--------|---------|--------|---------|--------|---------|
|                      |             | 5μM    |         | 10μM   |         | 20μM   |         |
|                      |             | 48h    | 48h+24h | 48h    | 48h+24h | 48h    | 48h+24h |
| Phe                  | <i>%var</i> | 0      | -24.03  | 22.52  | 16.59   | 0      | 27.29   |
|                      | ±           |        | 3.87    | 4.02   | 5.94    |        | 5.68    |
|                      | <i>ES</i>   | 0      | -4.33   | 3.10   | 1.59    | 0      | 2.60    |
|                      | <i>p</i>    |        | 0.0007  | 0.0129 | 0.0563  |        | 0.0112  |
| Tyr                  | <i>%var</i> | -16.91 | -36.13  | 0      | 13.28   | 0      | 21.23   |
|                      | ±           | 6.33   | 4.38    |        | 6.11    |        | 6.07    |
|                      | <i>ES</i>   | -1.79  | -6.19   | 0      | 1.25    | 0      | 1.95    |
|                      | <i>p</i>    | 0.0306 | 0.0002  |        | 0.1023  |        | 0.0290  |
| PCr                  | <i>%var</i> | 0      | 0       | 34.32  | 24.82   | 0      | 0       |
|                      | ±           |        |         | 5.07   | 8.78    |        |         |
|                      | <i>ES</i>   | 0      | 0       | 3.55   | 1.55    | 0      | 0       |
|                      | <i>p</i>    |        |         | 0.0066 | 0.0625  |        |         |
| Cr                   | <i>%var</i> | 59.47  | 0       | -16.76 | 0       | 0      | 28.29   |
|                      | ±           | 7.16   |         | 7.24   |         |        | 5.90    |
|                      | <i>ES</i>   | 3.94   | 0       | -1.55  | 0       | 0      | 2.32    |
|                      | <i>p</i>    | 0.0010 |         | 0.0504 |         |        | 0.0233  |
| ATP                  | <i>%var</i> | 0      | 0       | 41.52  | 0       | 53.13  | 0       |
|                      | ±           |        |         | 8.28   |         | 4.46   |         |
|                      | <i>ES</i>   | 0      | 0       | 2.55   | 0       | 5.79   | 0       |
|                      | <i>p</i>    |        |         | 0.0099 |         | 0.0003 |         |
| NADH                 | <i>%var</i> | 62.88  | 0       | 34.09  | 20.35   | 46.21  | 55.81   |
|                      | ±           | 9.38   |         | 7.12   | 12.26   | 10.93  | 12.96   |
|                      | <i>ES</i>   | 3.14   | 0       | 2.52   | 0.93    | 2.11   | 2.07    |
|                      | <i>p</i>    | 0.0030 |         | 0.0095 | 0.1871  | 0.0185 | 0.0155  |
| 1-Methylnicotinamide | <i>%var</i> | 152.75 | 56.61   | 38.46  | 22.91   | 83.24  | 50.44   |
|                      | ±           | 6.98   | 12.39   | 4.12   | 11.32   | 5.37   | 11.40   |
|                      | <i>ES</i>   | 7.62   | 2.19    | 4.81   | 1.12    | 6.73   | 2.17    |
|                      | <i>p</i>    | 0.0006 | 0.0194  | 0.0003 | 0.1249  | 0.0003 | 0.0174  |

**Table S3.** (cont.)

|                 |             | BA      |         |        |         | UA     |         |
|-----------------|-------------|---------|---------|--------|---------|--------|---------|
|                 |             | 5μM     |         | 10μM   |         | 20μM   |         |
|                 |             | 48h     | 48h+24h | 48h    | 48h+24h | 48h    | 48h+24h |
| Choline         | <i>%var</i> | 46.22   | 0       | 31.99  | 0       | 30.58  | 0       |
|                 | ±           | 5.48    |         | 10.12  |         | 5.34   |         |
|                 | <i>ES</i>   | 4.21    | 0       | 1.68   | 0       | 3.05   | 0       |
|                 | <i>p</i>    | 0.0005  |         | 0.0515 |         | 0.0027 |         |
| PC              | <i>%var</i> | -78.42  | 0       | -26.30 | -38.35  | -17.27 | -38.16  |
|                 | ±           | 9.97    |         | 10.76  | 11.54   | 8.07   | 8.48    |
|                 | <i>ES</i>   | -7.96   | 0       | -1.73  | -2.53   | -1.44  | -3.42   |
|                 | <i>p</i>    | 0.00004 |         | 0.0360 | 0.0081  | 0.0578 | 0.0016  |
| GPC             | <i>%var</i> | 307.70  | 188.81  | 108.51 | -32.45  | 160.13 | 0       |
|                 | ±           | 7.34    | 17.03   | 7.69   | 11.53   | 8.43   |         |
|                 | <i>ES</i>   | 10.15   | 3.51    | 5.63   | -2.07   | 6.49   | 0       |
|                 | <i>p</i>    | 0.0003  | 0.0068  | 0.0015 | 0.0364  | 0.0012 |         |
| GSH             | <i>%var</i> | -31.85  | -24.73  | -30.60 | -27.29  | -21.64 | -26.66  |
|                 | ±           | 4.66    | 20.84   | 5.71   | 11.44   | 4.28   | 12.31   |
|                 | <i>ES</i>   | -4.99   | -0.83   | -3.89  | -1.70   | -3.48  | -1.54   |
|                 | <i>p</i>    | 0.0003  | 0.2549  | 0.0008 | 0.0382  | 0.0019 | 0.0559  |
| <i>myo</i> -Lno | <i>%var</i> | -19.23  | -52.77  | -13.14 | 0       | 0      | 0       |
|                 | ±           | 5.02    | 9.47    | 3.34   |         |        |         |
|                 | <i>ES</i>   | -2.60   | -4.65   | -2.59  | 0       | 0      | 0       |
|                 | <i>p</i>    | 0.0090  | 0.0022  | 0.0057 |         |        |         |
| Dimethylamine   | <i>%var</i> | -40.51  | 0       | -53.26 | -15.34  | -41.93 | -23.93  |
|                 | ±           | 17.23   |         | 17.87  | 8.94    | 17.00  | 8.69    |
|                 | <i>ES</i>   | -1.81   | 0       | -2.50  | -1.14   | -1.92  | -1.92   |
|                 | <i>p</i>    | 0.0480  |         | 0.0266 | 0.1253  | 0.0458 | 0.0379  |



**Table S4.** Assignment of resonances in the NMR profile of organic extracts from MDA-MB-231 cells and MCF-10A cells. Multiplicity: s, singlet; d, doublet; t, triplet; m, multiplet; dd, double of doublets.

| No. | Compound                                    | $\delta$ <sup>1</sup> H in ppm ( multiplicity/<br>assignment)/ $\delta$ <sup>13</sup> C in ppm                                                                                                                                                                                                                                                                                                                                                                                                                                                                                                                                                                                                                                                        | Cell type  |         |
|-----|---------------------------------------------|-------------------------------------------------------------------------------------------------------------------------------------------------------------------------------------------------------------------------------------------------------------------------------------------------------------------------------------------------------------------------------------------------------------------------------------------------------------------------------------------------------------------------------------------------------------------------------------------------------------------------------------------------------------------------------------------------------------------------------------------------------|------------|---------|
|     |                                             |                                                                                                                                                                                                                                                                                                                                                                                                                                                                                                                                                                                                                                                                                                                                                       | MDA-MB-231 | MCF-10A |
| 1   | Cholesterol                                 | 0.69 (s, CH <sub>3</sub> -18)/11.84; 0.85 (d, CH <sub>3</sub> -26)/22.54; 0.89 (d, CH <sub>3</sub> -27)/22.54; 0.89(d, CH <sub>3</sub> -21)/18.54; 0.92 (m, CH-9)/50.02; 0.98 (m, CH-14)/56.92; 0.99 (s, CH <sub>3</sub> -19)/19.21; 1.06 (s, CH-15)/24.26; 1.06 (m, CH <sub>2</sub> -1)/37.15; 1.07 (m, CH-17)/56.07; 1.11 (m, CH <sub>2</sub> -24)/39.45; 1.12 (m, CH <sub>2</sub> -23)/23.71; 1.32 (m, CH-20)/35.90; 1.47 (m, CH <sub>2</sub> -11)/20.94; 1.49 (m, CH <sub>2</sub> -2)/31.67; 1.50 (m, CH-25)/27.82; 1.94 (t, CH <sub>2</sub> -7)/31.94; 1.97 (t, CH <sub>2</sub> -7')/31.94; 1.98 (CH <sub>2</sub> -12)/39.63; 2.00 (CH <sub>2</sub> -12)/39.58; 2.26 (m, CH <sub>2</sub> -4')/42.17; 3.51 (m, CH-3)/71.68; 5.33 (m, CH-6)/121.65 | ✓          | ✓       |
| 2   | Cholesterol ester                           | 1.02 (s, CH <sub>3</sub> -19); 1.83 (m, CH <sub>2</sub> -2); 1.84 (m, CH <sub>2</sub> -1)/37.10; 2.31 (m, CH <sub>2</sub> -4'); 4.61 (m, CH-3)                                                                                                                                                                                                                                                                                                                                                                                                                                                                                                                                                                                                        | ✓          | ✓       |
| 3   | Diglycerides                                | 3.73, 4.28 (glyceryl CH <sub>2</sub> <i>sn1/sn3</i> ); 5.08 (glyceryl CH <i>sn2</i> )                                                                                                                                                                                                                                                                                                                                                                                                                                                                                                                                                                                                                                                                 | ✓          | ✓       |
| 4   | Fatty acyl chains (mainly in phospholipids) | 0.87 (t, CH <sub>3</sub> (CH <sub>2</sub> ) <sub>n</sub> )/13.98; 1.27 (m, (CH <sub>2</sub> ) <sub>n</sub> )/22.54/29.55/31.71; 1.57 (m, -CH <sub>2</sub> -CH <sub>2</sub> CO)/24.80; 2.03 (m, -CH <sub>2</sub> CH=)/27.07; 2.28 (m, -CH <sub>2</sub> COOR)/34.06; 2.80 (t, =CHCH <sub>2</sub> CH=)/25.50; 5.35 (m, -HC=CH-)/129.03                                                                                                                                                                                                                                                                                                                                                                                                                   | ✓          | ✓       |
| 5   | Free fatty acids                            | 0.98 (t, CH <sub>3</sub> (CH <sub>2</sub> ) <sub>n</sub> ); 1.61 (m, -CH <sub>2</sub> -CH <sub>2</sub> CO); 2.05 (m, -CH <sub>2</sub> CH=); 2.35 (t, -CH <sub>2</sub> COOH); 2.76 (t, =CHCH <sub>2</sub> CH=)                                                                                                                                                                                                                                                                                                                                                                                                                                                                                                                                         | ✓          | ✓       |
| 6   | Phosphatidylcholine (PTC)                   | 3.30 (s, N(CH <sub>3</sub> ) <sub>3</sub> )/54.44; 3.75 (CH <sub>2</sub> N)/66.45; 3.92 (glyceryl CH <sub>2</sub> <i>sn3</i> )/63.70; 4.38 (glyceryl CH <sub>2</sub> <i>sn1</i> )/62.77; 4.31 (CH <sub>2</sub> -OP)/59.33; 5.19 (glyceryl CH <i>sn2</i> )/70.27                                                                                                                                                                                                                                                                                                                                                                                                                                                                                       | ✓          | ✓       |
| 7   | Phosphatidylethanolamine (PTE, diacyl form) | 3.15 (s, CH <sub>2</sub> -N)/40.46; 3.55 (glyceryl CH <sub>2</sub> <i>sn1</i> )/69.05; 3.92 (glyceryl CH <sub>2</sub> <i>sn3</i> )/63.58; 4.11 (CH <sub>2</sub> -OP)/62.66; 5.19 (glyceryl CH <i>sn2</i> )/70.24                                                                                                                                                                                                                                                                                                                                                                                                                                                                                                                                      | ✓          | ✓       |
| 8   | PTE plasmalogen (PTE, plasmenyl form)       | 1.27 ((CH <sub>2</sub> ) <sub>n</sub> ); 2.00 (-CH=CH-CH <sub>2</sub> ); 3.90 (glyceryl CH <sub>2</sub> <i>sn3</i> ); 4.32 (glyceryl CH <sub>2</sub> <i>sn1</i> ); 5.90 (-CH=CH-)                                                                                                                                                                                                                                                                                                                                                                                                                                                                                                                                                                     | ✓          | ✓       |
| 9   | Sphingomyelin (SM)                          | 3.33 (s, N(CH <sub>3</sub> ) <sub>3</sub> ); 5.45 (-CH=CH-); 5.67 (-CH=CH-)                                                                                                                                                                                                                                                                                                                                                                                                                                                                                                                                                                                                                                                                           | ✓          | ✓       |
| 10  | Triglycerides (TG)                          | 4.13, 4.27 (dd, glyceryl CH <sub>2</sub> <i>sn1/sn3</i> )/61.93; 5.19 (glyceryl CH <i>sn2</i> )/70.26                                                                                                                                                                                                                                                                                                                                                                                                                                                                                                                                                                                                                                                 | ✓          | ✓       |
